# Supplementary material
Source: Springer Nature journal article supplement (https://www.springermedizin.de/resource/supplementary/12884_2008_49_MOESM6_ESM.pdf/9459818)

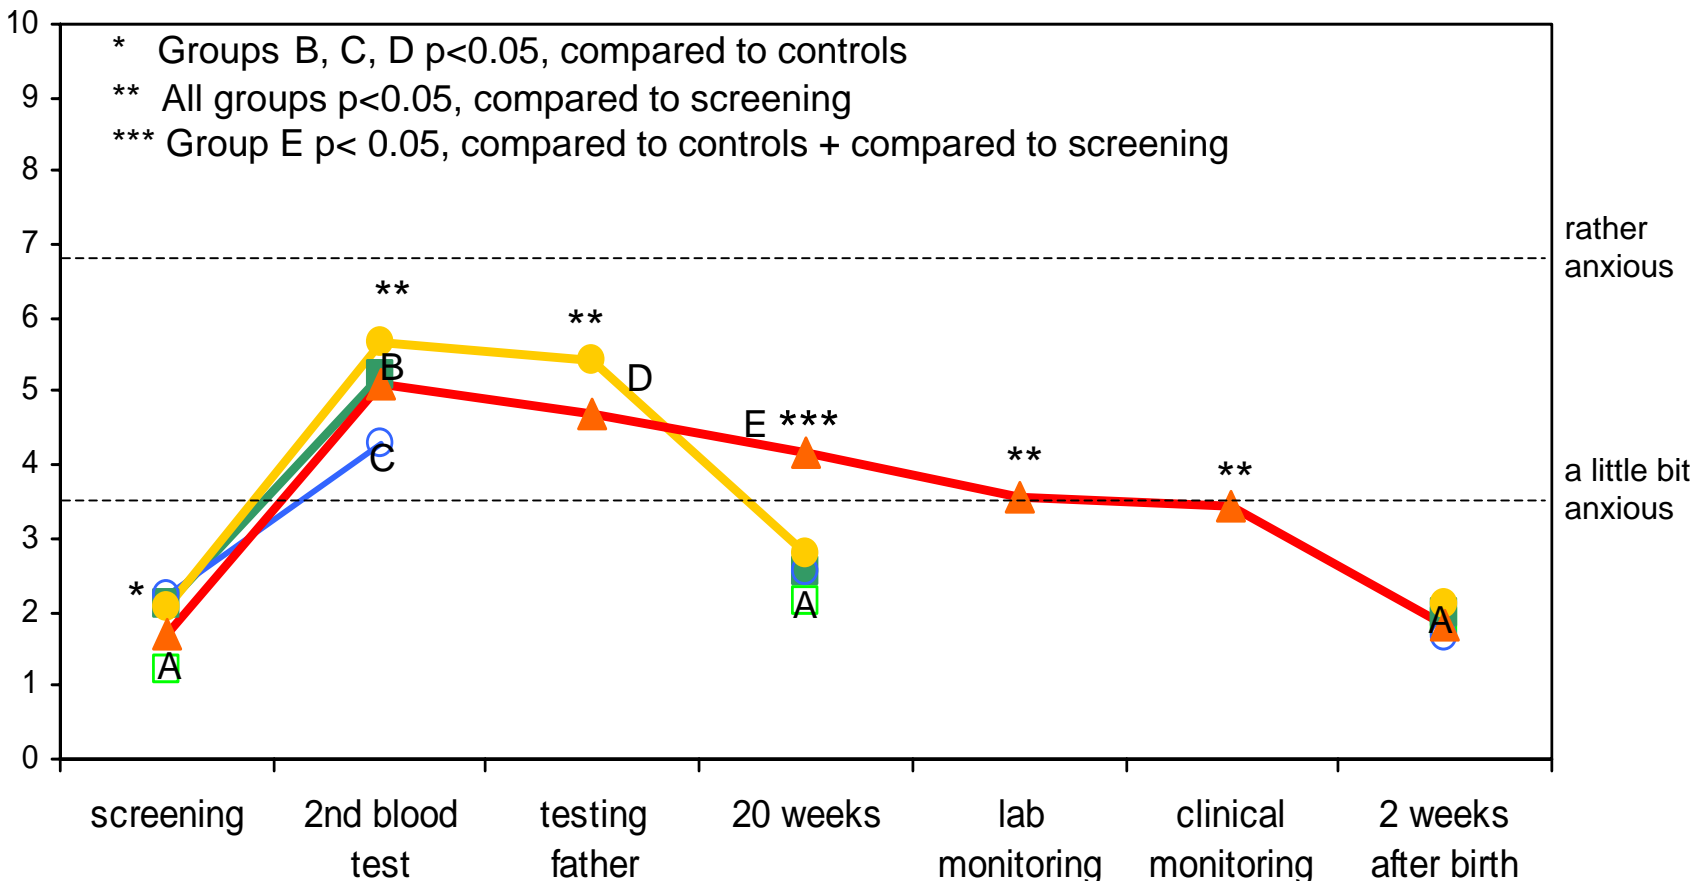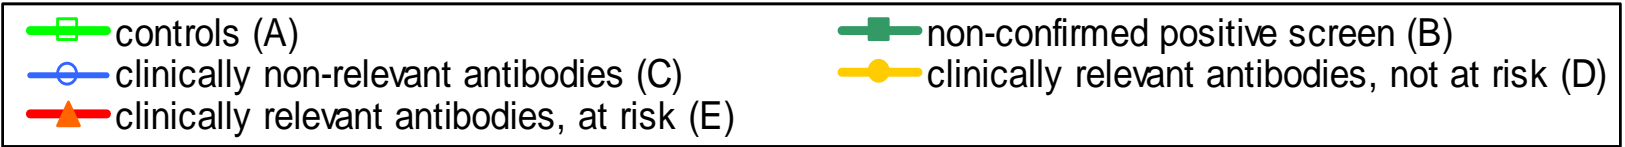

Supplement: MOESM6 [file 9459818]
